# Supplementary material for: A new water-soluble and colorimetric fluorescent probe for highly sensitive detection of organophosphorus pesticides
Source: Royal Society of Chemistry journal article supplement (doi:10.1039/c6ra16509e), 2016-01-01
Supplement: c6ra16509e1.pdf [file c6ra16509e1.pdf]

## Supporting Information

### **A new water-soluble and colorimetric fluorescent probe for highly sensitive detection of organophosphorus pesticides**

Youming Shen,<sup>ab</sup> Fengmei Yan,<sup>a</sup> Xi Huang,<sup>b</sup> Xiangyang Zhang,<sup>\*a</sup> Youyu Zhang,<sup>\*b</sup> Chunxiang Zhang,<sup>a</sup> Junling Jin,<sup>\*a</sup> Haitao Li,<sup>b</sup> and Shouzhuo Yao<sup>b</sup>

<sup>a</sup> College of Chemistry and Chemical Engineering, Hunan University of Arts and Science, ChangDe, 415000, PR China E-mail: zhangxiangy06@163.com

<sup>b</sup> Key Laboratory of Chemical Biology and Traditional Chinese Medicine Research (Ministry of Education), College of Chemistry and Chemical Engineering, Hunan Normal University, Changsha 410081, PR China E-mail: zhangyy@hunnu.edu.cn

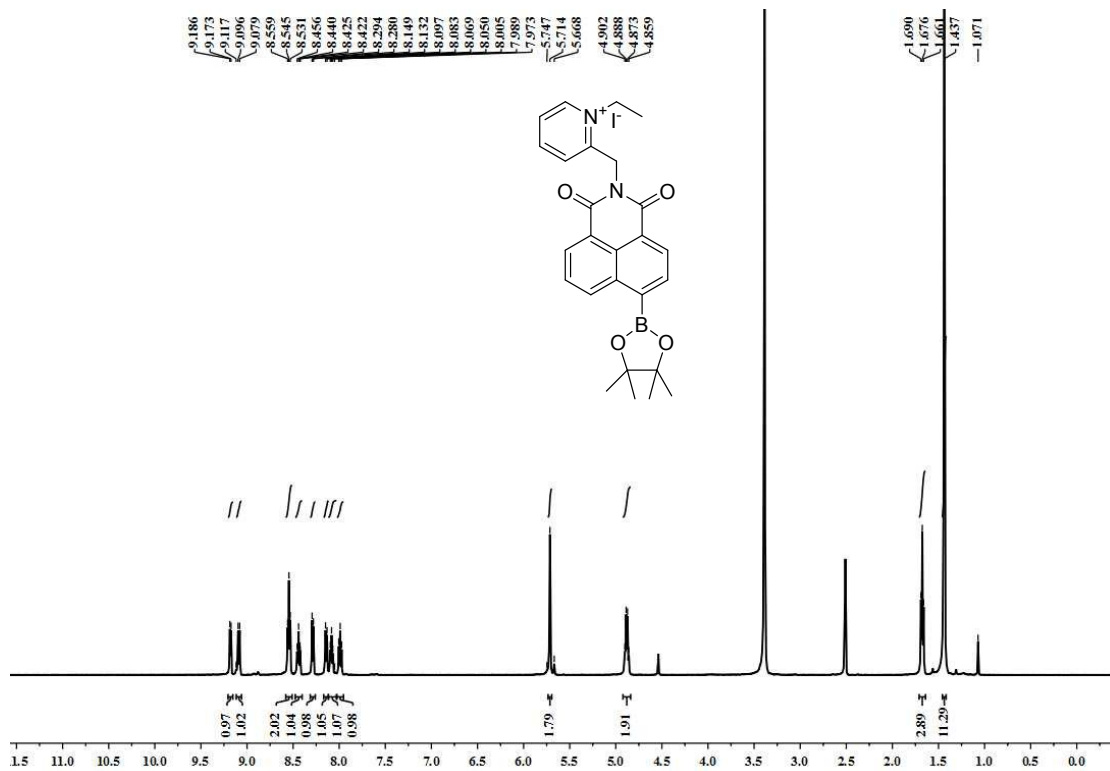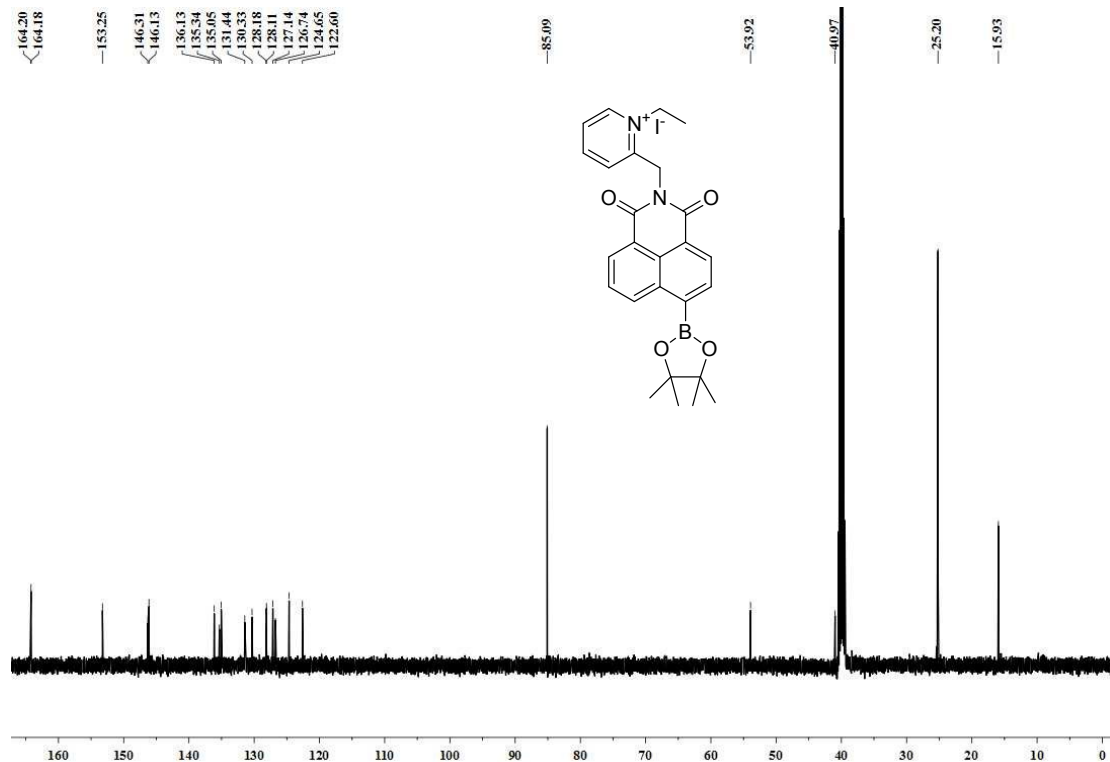

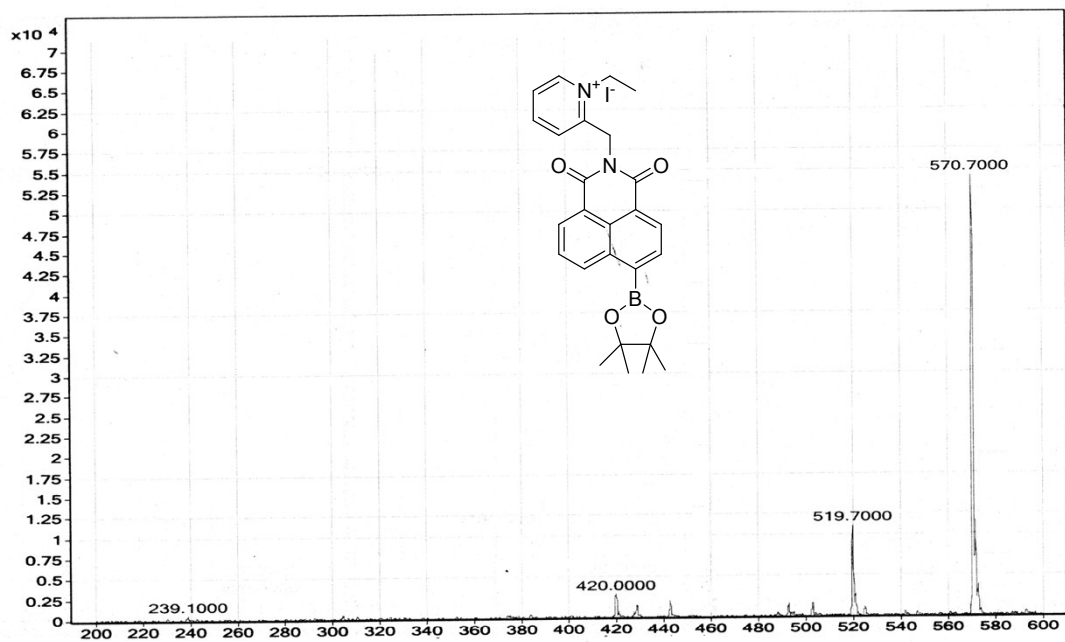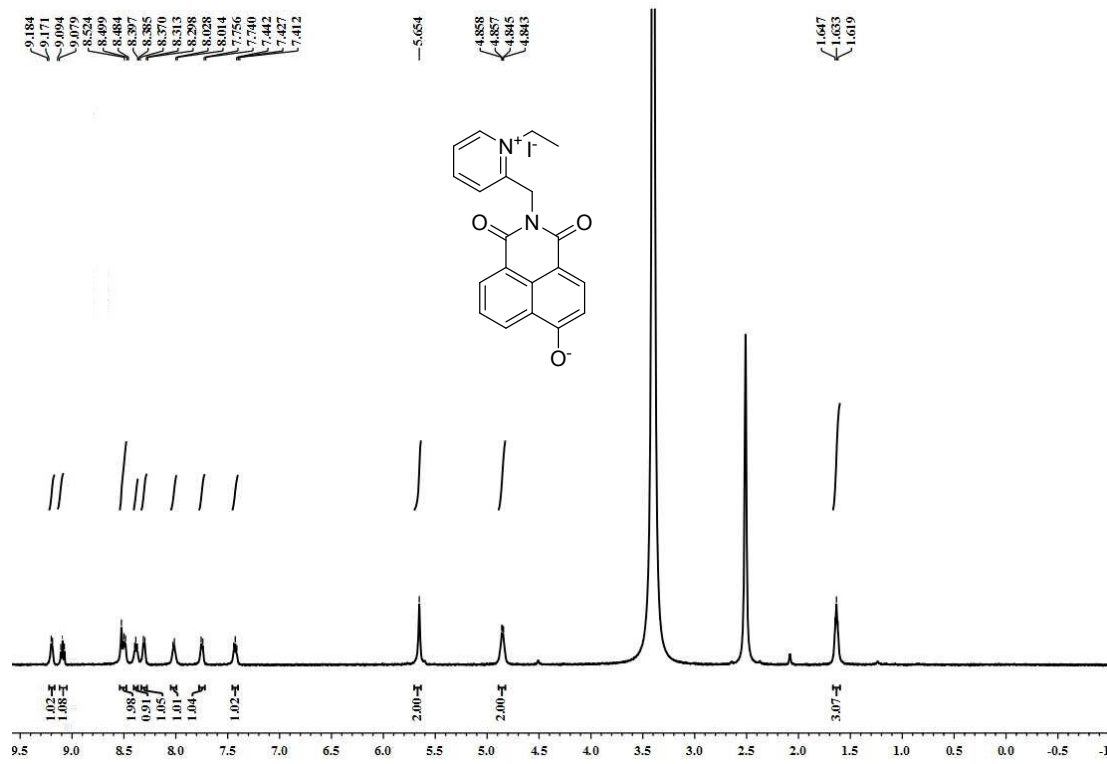

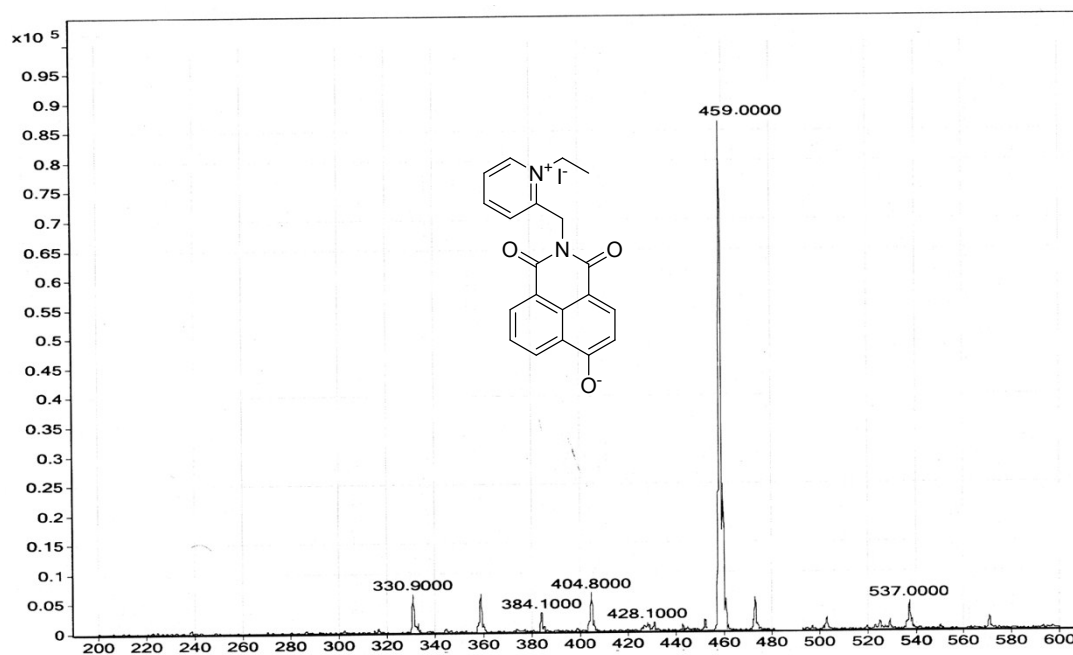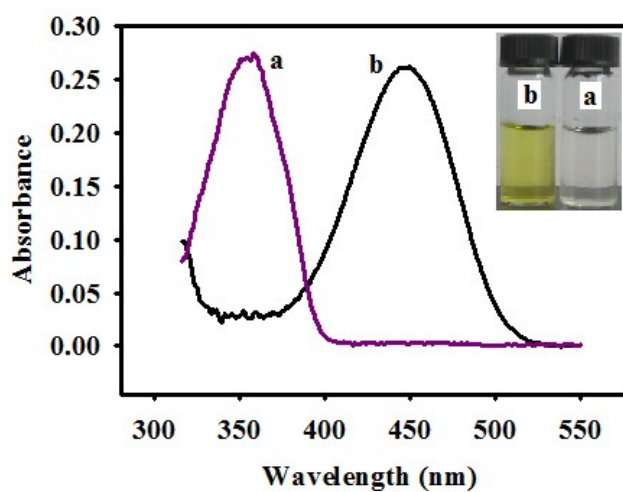

**Fig. S1** UV-vis absorption spectra of PBS buffered solution (10 mM, pH = 7.4). (a) Compound **1** + AchE + ChOx + parathion-methyl + ACh, (b) Compound **1** + AchE + ChOx + ACh.  $\lambda_{\text{ex}} = 455$  nm.
